# Supplementary material for: Development of a liquid crystal laser using a simple cubic liquid crystalline blue phase platform
Source: Royal Society of Chemistry journal article supplement (doi:10.1039/c9ra07460k), 2019-01-01
Supplement: c9ra07460k1.pdf [file c9ra07460k1.pdf]

## Supporting Information

Development of a liquid crystal laser using a simple cubic liquid crystalline blue-phase platform

Hyeon-Joon Choi,<sup>a</sup> Jae-Hyun Bae,<sup>a</sup> Sangwok Bae,<sup>a</sup> Jae-Jin Lee,<sup>a</sup> Hiroya Nishikawa,<sup>b</sup>

Fumito Araoka,<sup>b</sup> and Suk-Won Choi <sup>\*a</sup>

<sup>a</sup> Department of Advanced Materials Engineering for Information and Electronics, Kyung Hee University, Yongin-shi, Gyeonggi-do 17104, Korea.

<sup>b</sup> Physicochemical Soft Matter Research Team, RIKEN Center for Emergent Matter Science (CEMS), Wako, Saitama 351-0198, Japan

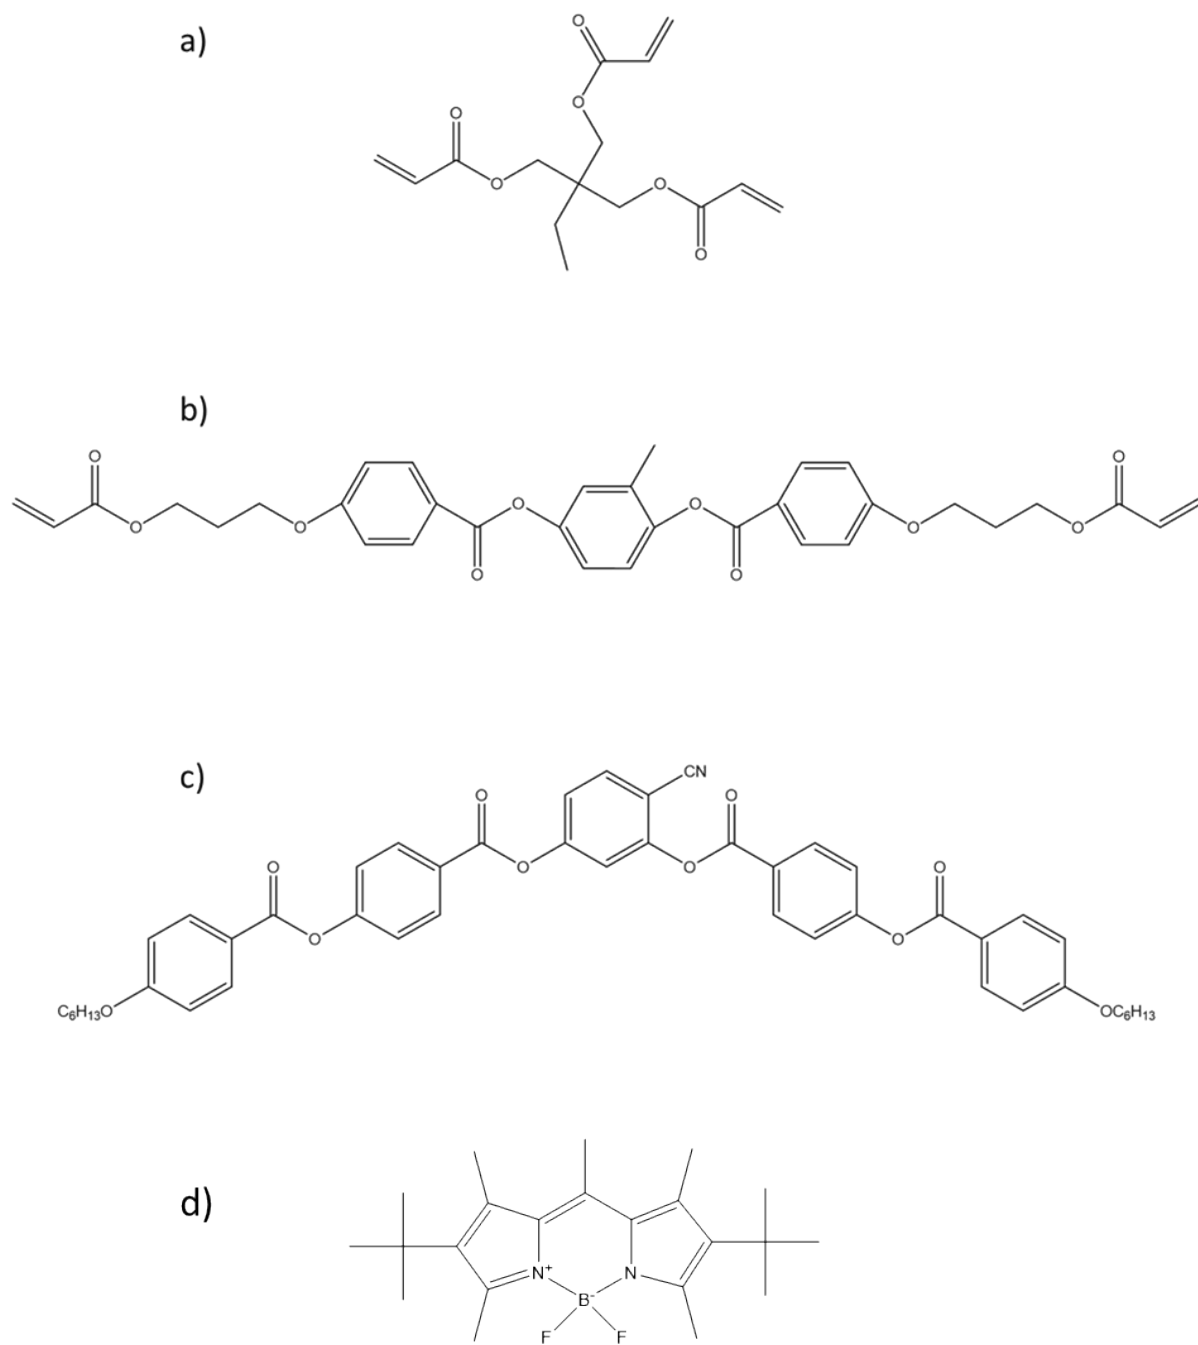

Fig. S1 Chemical structure of a) TMPTA, b) RM257, c) bent-core molecule, and d) PM597.
